# Supplementary material for: Reliability and validity of telephonic Barthel Index: an experience from multi-centric randomized control study
Source: Springer Nature journal article supplement (doi:10.1007/s13760-017-0843-2), 2018-01-24
Supplement: MOESM1 [file 15412410]

**Supplemental Table I:** Centre wise agreement between face-to-face and telephonic BI at six months

|  | **AIIMS**  **N= 24** | **SGPGI**  **N= 25** | **AFMC**  **N= 24** | **PGIMER**  **N= 24** | **R & R**  **N= 23** |
| --- | --- | --- | --- | --- | --- |
| **Telephone** | **Face to Face** | | | | |
| **Kappa* (95% CI)** | **Kappa* (95% CI)** | **Kappa* (95% CI)** | **Kappa* (95% CI)** | **Kappa* (95% CI)** |
| **Feeding** | 1.000 ( . - .) | 0.664 (0.330 - 0.777) | 0.643 (0.312 - 0.857) | 0.554 (0.496 - 0.731) | 0.484 (0.000 - 0.627) |
| **Moving (Bed to chair and back)** | 0.860 (0.796 - 0.924) | 0.749 (0.627 - 0.935) | 0.739 (0.658 - 0.747) | 0.563 (0.294 - 0.622) | 0.497 (0.361 - 0.785) |
| **Personal Toilet** | 0.636 (0.336 - 0.937) | 0.469 (0.073 - 0.866) | 0.471 (-0.036 - 0.977) | 0.471 (-0.036 - 0.977) | 0.563 (0.225 - 0.900) |
| **Getting on & off toilet** | 0.831 (0.600 - 1.000) | 0.424 (0.298 - 0.867) | 0.585 (0.543 - 0.682) | 0.625 (0.547 - 0.704) | 0.659 (0.514 - 0.751) |
| **Bathing self** | 0.861 (0.597 - 1.000) | 0.650 (0.292 - 1.000) | 0.824 (0.493 - 1.000) | 0.824 (0.493 - 1.000) | 0.473 (0.117 - 0.829) |
| **Walking (on level surface)** | 0.691 (0.610 - 0.729) | 0.805 (0.781 - 0.891) | 0.700 (0.385 - 0.818) | 0.753 (0.715 - 0.773) | 0.388 (0.166 - 0.489) |
| **Stairs** | 0.609 (0.528 - 0.758) | 0.750 (0.581 - 0.831) | 0.806 (0.654 - 0.809) | 0.801 (0.603 - 0.871) | 0.421 (0.144 - 0.519) |
| **Dressing** | 1.000 ( . - .) | 0.725 (0.491 - 0.776) | 0.609 (0.450 - 0.856) | 0.684 (0.659 - 0.850) | 0.546 (0.355 - 0.720) |
| **Bowels** | 1.000 ( . - .) | 0.776 (0.017 - 1.000) | 0.695 (0.523 - 0.807) | 0.571 (0.400 - 0.787) | 0.789 (0.000 - 1.000) |
| **Bladder** | 1.000 ( . - .) | 0.678 (0.278 - 0.875) | 0.631 (0.238 - 0.870) | 0.526 (0.393 - 0.592) | 0.646 (0.000 - 1.000) |
| **Total** | **0.711 (0.628-0.784)** | **0.719 (0.551-0.727)** | **0.795 (0.734-0.820)** | **0.635 (0.523-0.655)** | **0.465 (0.333-0.486)** |

Cronbach Alpha (AIIMS): 0.9024; Cronbach Alpha (SGPGI): 0.9960; Cronbach Alpha (AFMC): 0.9806; Cronbach Alpha (PGI): 0.9933; Cronbach Alpha (R&R): 0.888

**Abbreviations:** AIIMS- All India Institute of Medical Sciences, SGPGI-Sanjay Gandhi Postgraduate Institute of Medical Sciences, AFMC- Armed Forces Medical College, PGIMER- Postgraduate Institute of Medical Education & Research, R & R- Army Hospital Research & Referral.

**Supplemental Table II:** Sensitivity and specificity for different cutoffs of telephonic BI at three months

|  | **Face-to-Face Interview (at site)** | | | **Sensitivity** | **Specificity** |
| --- | --- | --- | --- | --- | --- |
| **Telephonic BI (3 months)** |  | ≤60 | >60 |  |  |
| ≤60 | 35 | 12 | 87.5% | 80% |
| >60 | 5 | 48 |
|  | **Face-to-Face Interview (at site)** | | | **Sensitivity** | **Specificity** |
| **Telephonic BI (3 months)** |  | ≤80 | >80 |  |  |
| ≤80 | 66 | 10 | 95.6% | 67.7% |
| >80 | 3 | 21 |

**Supplemental Table III:** Sensitivity and specificity for different cutoffs of telephonic BI at six months

|  | **Face-to-Face Interview (at site)** | | | **Sensitivity** | **Specificity** |
| --- | --- | --- | --- | --- | --- |
| **Telephonic BI (6 months)** |  | ≤60 | >60 |  |  |
| ≤60 | 58 | 9 | 89.2% | 75% |
| >60 | 7 | 27 |
|  | **Face-to-Face Interview (at site)** | | | **Sensitivity** | **Specificity** |
| **Telephonic BI (6 months)** |  | ≤80 | >80 |  |  |
| ≤80 | 31 | 3 | 77.5% | 95% |
| >80 | 9 | 58 |

**Supplemental Table IV**: Correlation between BI, mRS and NIHSS

|  | **mRS** | | **NIHSS** | |
| --- | --- | --- | --- | --- |
| **BI** | **3 months** | **6 months** | **3 months** | **6 months** |
| **3 months** | -0.9 | — | -0.4 | — |
| **6 months** | — | -0.9 | — | -0.4 |

All values are significant at 0.05% level

**Supplemental Table V:** Sample size calculation based on standard deviation observed in telephonic and face to face assessment for particular effect size.

| **Difference** | **Face to Face SD (three months)**  **Sample size**  **(SD =30.7)** | **Telephone SD (three months)**  **Sample size**  **(SD = 27.8)** | **Face to Face SD (6 months)**  **Sample size**  **(SD = 32.2)** | **Telephonic SD (6 months)**  **Sample size**  **(SD =29.5)** |
| --- | --- | --- | --- | --- |
| Small (mean difference 5) | 296 | 243 | 326 | 274 |

For sample size calculation (one sample) we assumed 80% Power and level of significance as 0.05

**Supplemental Table VI:** Agreement between telephone and face-to-face assessment for each item of BI at 12 months

| **Face-to-Face** | | | | | |
| --- | --- | --- | --- | --- | --- |
| **Telephone** | **0** | **5** | **10** | **15** | **Kappa* (95%CI)** |
| Feeding  0  5  10  Moving (Bed to chair and back)  0  5  10  15  Personal Toilet  0  5  Getting on and off toilet  0  5  10  Bathing self  0  5  10  Walking (on level surface)  0  10  15  Stairs  0  5  10  Dressing  0  5  10  Bowels  0  5  10  Bladder  0  5  10 | 7  2  1  7  3  1  0  40  9  12  4  0  53  3  12  1  0  16  2  0  12  3  0  7  0  0  7  0  0 | 0  3  6  2  2  2  1  12  24  5  25  3  12  17  0  29  5  10  32  2  1  0  5  1  0  4 | 0  7  59  0  3  6  6  0  10  26  6  9  6  2  8  23  1  14  11  1  1  70  1  2  70 | 0  4  8  40  2  9  40 | 0.621 (0.493 - 0.722)  0.597 (0.478 - 0.653)  0.488 (0.300 - 0.677)  0.672 (0.604 - 0.792)  0.576 (0.390 - 0.762)  0.621 (0.554 - 0.742)  0.719 (0.551 - 0.819)  0.491 (0.352 - 0.512)  0.739 (0.482 - 0.848)  0.738 (0.657 - 0.843) |
| **Total** |  | | | | **0.680 (0.587-0.754)** |

Cronbach Alpha: 0.9048
